# Supplementary material
Source: publisher figshare collection journal article supplement (https://aacr.figshare.com/articles/dataset/_/22442474)
Supplement: Supplementary file 1 [file 39893366]

## **Kong Y. et al. Supplementary Fig S1**

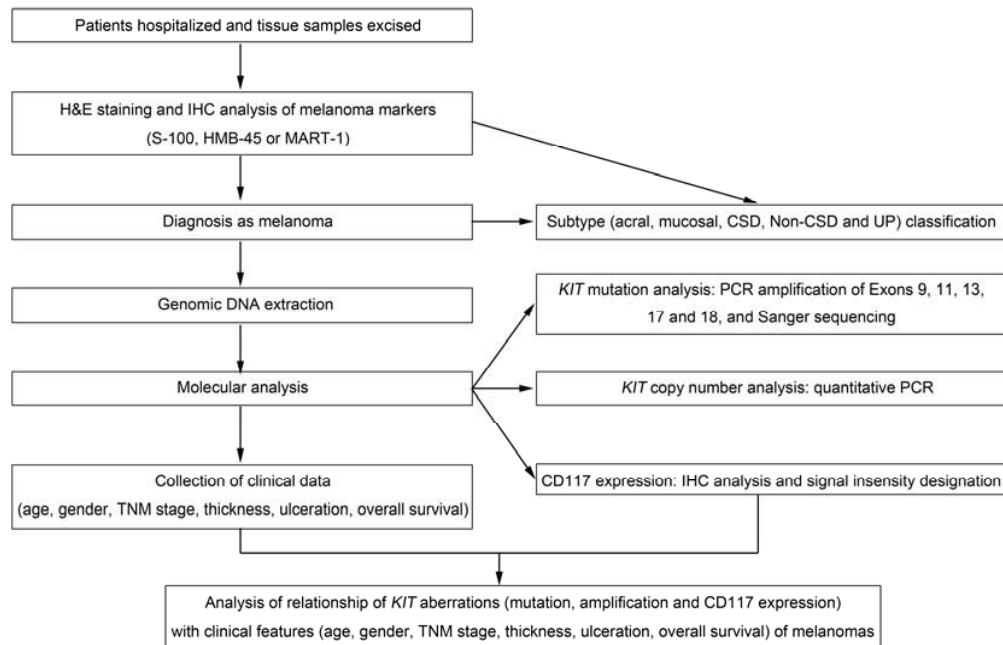

**Supplementary Fig S1.** Schematic Diagram of the experimental processes in this study. H&E, hematoxylin and eosin; TNM, tumor-nodes-metastases; IHC, immunohistochemistry.

**Kong Y. et al. Supplementary Fig S2**

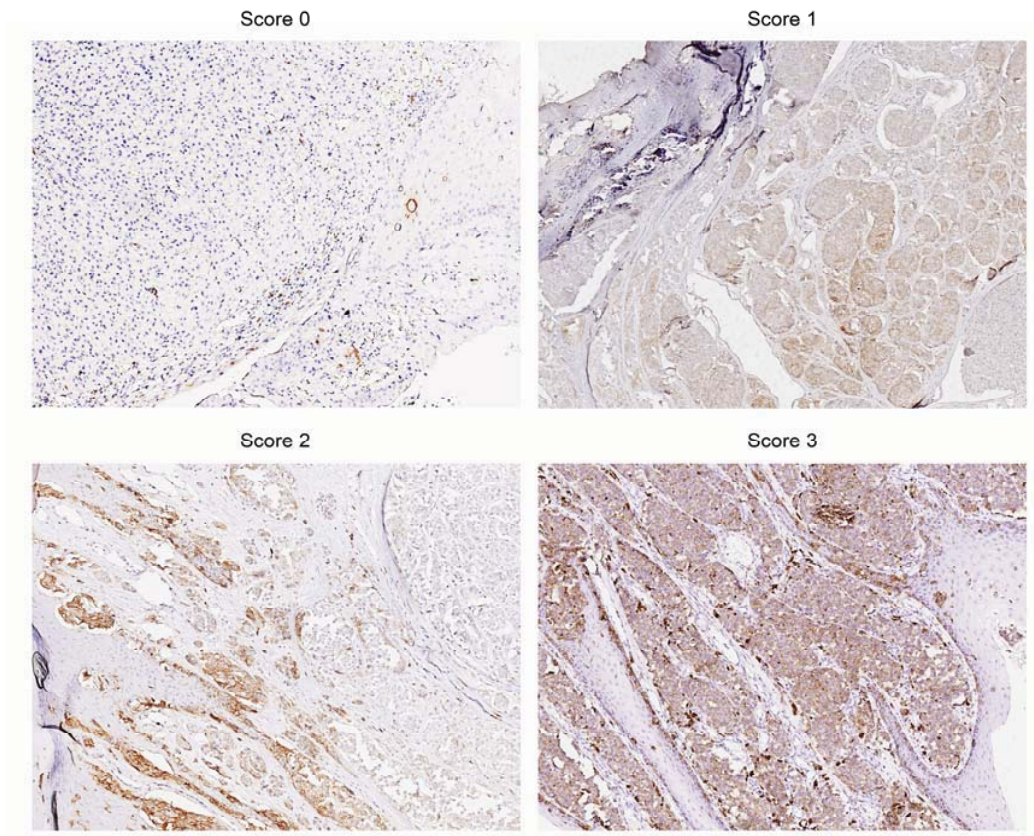

**Supplementary Fig S2.** Representative examples of the scores designated to the results of immunohistochemistry analysis of CD117 expression in melanoma samples.

### **Kong Y. et al. Supplementary Fig S3**

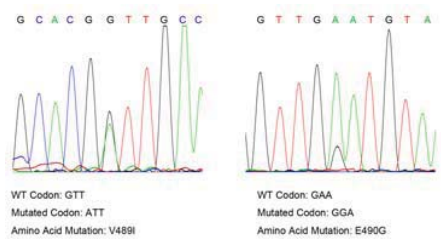

Supplementary Fig. S3. Examples of the genetic mutations in exon 9 of *KIT* gene. WT, wild type.

## Kong Y. et al. Supplementary Fig S4

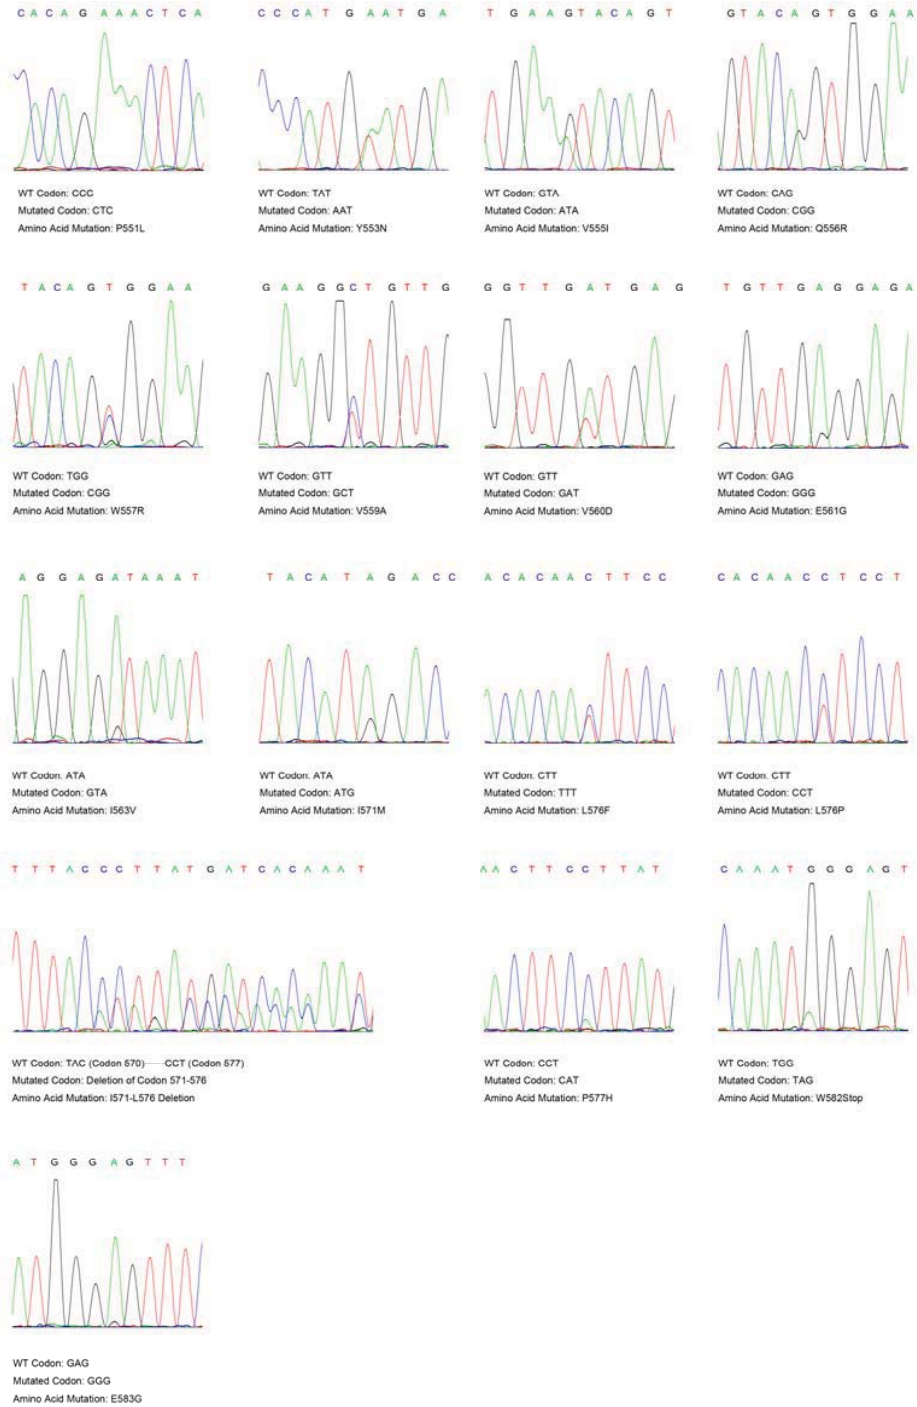

Supplementary Fig. S4. Examples of the genetic mutations in exon 11 of KIT gene. WT, wild type.

## Kong Y. et al. Supplementary Fig S5

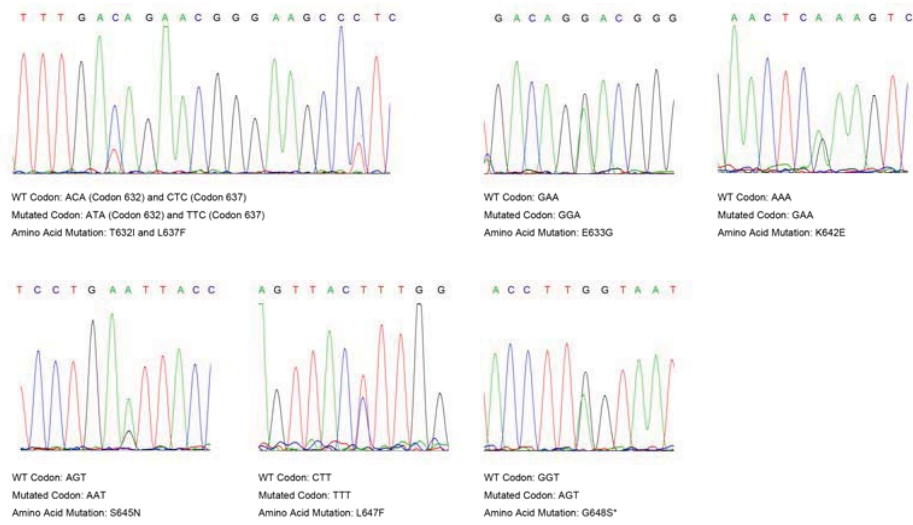

**Supplementary Fig. S5.** Examples of the genetic mutations in exon 13 of *KIT* gene. The same-sense mutation L637L (\*) were not shown. WT, wild type.

## **Kong Y. et al. Supplementary Fig S6**

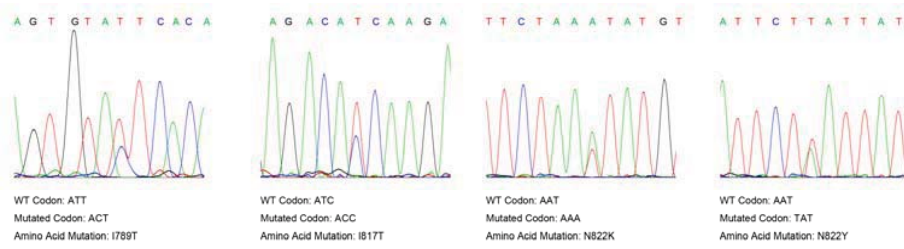

Supplementary Fig. S6. Examples of the genetic mutations in exon 17 of KIT gene. WT, wild type.

## Kong Y. et al. Supplementary Fig S7

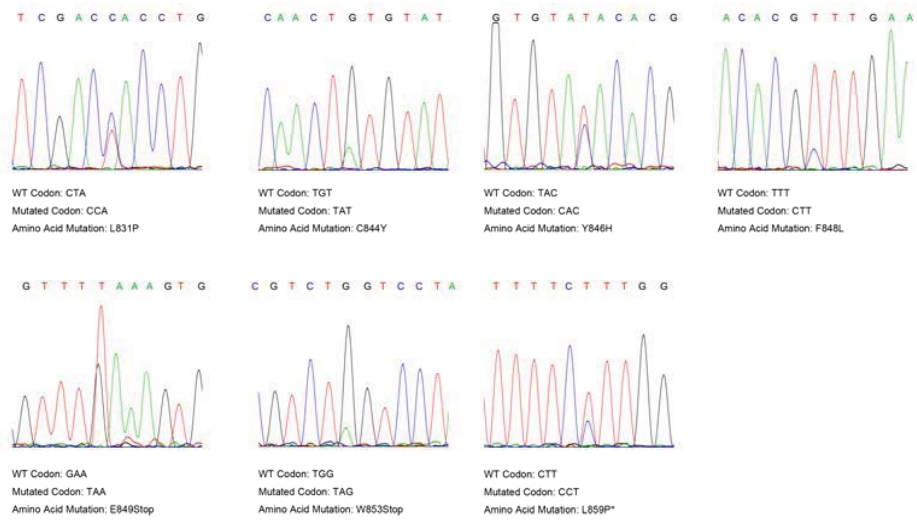

Supplementary Fig. S7. Examples of the genetic mutations in exon 18 of KIT gene. The same-sense mutation L865L (\*) was not shown. WT, wild type.

## Kong Y. et al. Supplementary Fig S8

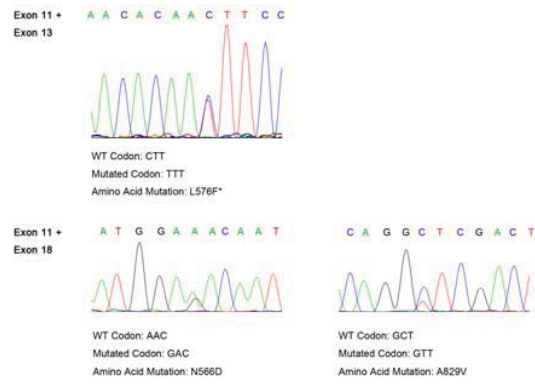

Supplementary Fig. S8. Examples of the genetic mutations in two separate exons of *KIT* gene. The same-sense mutation A631A (\*) was not shown. WT, wild type.



## Kong Y. et al. Supplementary Table S1

Supplementary Table S1. Patient characteristics and genetic mutations in Chinese melanoma subtypes

| Code <sup>a</sup> | Subtype | Age | Sex    | TNM Stage | KIT Mutation | KIT Amplification <sup>b</sup> | CD117 (IHC Scores) <sup>c</sup> | Thickness (mm) | Ulceration | Overall Survival (month) | Death |
|-------------------|---------|-----|--------|-----------|--------------|--------------------------------|---------------------------------|----------------|------------|--------------------------|-------|
| 1                 | UP      | 36  | Male   | III       | wt           | Yes                            | 2                               | NA             | NA         | 42                       | Yes   |
| 2                 | UP      | 22  | Female | IIIc      | wt           | Yes                            | 1                               | NA             | NA         | 12                       | Yes   |
| 3                 | Mucosal | 61  | Female | IIc       | W557R        | No                             | 1                               | 5.5            | Yes        | 23                       | No    |
| 4                 | Acral   | 61  | Male   | NA        | wt           | No                             | 0                               | NA             | NA         | 114                      | No    |
| 5                 | Acral   | 52  | Male   | IIIc      | wt           | No                             | 0                               | 3              | No         | 20                       | Yes   |
| 6                 | Acral   | 39  | Female | IV        | wt           | No                             | 1                               | 6              | No         | 20                       | Yes   |
| 7                 | Mucosal | 62  | Male   | IIb       | wt           | No                             | 0                               | 3              | Yes        | 45                       | No    |
| 8                 | Acral   | 71  | Male   | IIc       | wt           | No                             | 1                               | 4.5            | Yes        | 23                       | No    |
| 9                 | Mucosal | 65  | Male   | NA        | wt           | Yes                            | 0                               | NA             | NA         | 101                      | No    |
| 10                | Mucosal | 33  | Female | IIb       | wt           | No                             | 0                               | 3              | Yes        | 87                       | No    |
| 11                | Mucosal | 43  | Female | IIb       | wt           | No                             | 0                               | 3              | Yes        | 49                       | Yes   |
| 12                | Mucosal | 69  | Female | IIb       | wt           | No                             | 1                               | 4.5            | No         | 25                       | No    |
| 13                | Mucosal | 50  | Male   | IIIc      | V559A        | No                             | 2                               | 5              | No         | 20                       | Yes   |
| 14                | CSD     | 34  | Female | IIIc      | wt           | No                             | 0                               | 7              | Yes        | 3                        | Yes   |
| 15                | Acral   | 58  | Male   | IIIa      | wt           | No                             | 0                               | NA             | NA         | 32                       | No    |
| 16                | Mucosal | 59  | Female | IIa       | V560D        | No                             | 1                               | 1.5            | Yes        | 33                       | Yes   |
| 17                | Mucosal | 61  | Male   | IIc       | wt           | No                             | 3                               | 4.5            | Yes        | 81                       | Yes   |
| 18                | UP      | 53  | Female | IIIa      | wt           | Yes                            | 0                               | NA             | NA         | 33                       | Yes   |
| 19                | Mucosal | 37  | Male   | IIIa      | wt           | No                             | 2                               | 10             | Yes        | 31                       | No    |
| 20                | Mucosal | 63  | Female | NA        | wt           | No                             | 3                               | 1              | No         | 23                       | Yes   |
| 21                | Acral   | 63  | Male   | NA        | wt           | No                             | 0                               | 2.5            | Yes        | 13                       | Yes   |
| 22                | Acral   | 71  | Male   | IV        | wt           | No                             | 1                               | 5              | Yes        | 14                       | Yes   |
| 23                | Mucosal | 64  | Male   | NA        | wt           | No                             | 0                               | 5              | Yes        | 27                       | No    |
| 24                | Mucosal | 50  | Male   | IV        | wt           | No                             | 3                               | 5              | Yes        | 6                        | Yes   |
| 25                | Mucosal | 56  | Female | IIc       | I789T        | No                             | 1                               | 5              | Yes        | 77                       | Yes   |
| 26                | Mucosal | 69  | Female | IV        | I571-L576del | No                             | 2                               | 6              | No         | 9                        | Yes   |
| 27                | Mucosal | 28  | Female | IIc       | wt           | No                             | 0                               | 6              | Yes        | 56                       | Yes   |
| 28                | Mucosal | 72  | Female | IV        | wt           | No                             | 0                               | 2              | Yes        | 10                       | Yes   |
| 29                | UP      | 42  | Female | IIIc      | wt           | No                             | 1                               | NA             | NA         | 22                       | No    |
| 30                | Mucosal | 34  | Male   | IIIa      | wt           | No                             | 2                               | 1              | No         | 27                       | Yes   |
| 31                | Acral   | 78  | Female | IIIa      | E490G        | No                             | 0                               | 4              | Yes        | 21                       | Yes   |
| 32                | Mucosal | 46  | Female | IIb       | wt           | No                             | 1                               | 4              | Yes        | 26                       | Yes   |
| 33                | Mucosal | 58  | Male   | IIc       | wt           | No                             | 0                               | 5              | Yes        | 17                       | Yes   |
| 34                | Mucosal | 65  | Female | IV        | wt           | Yes                            | 0                               | 4.5            | Yes        | 12                       | Yes   |
| 35                | Non-CSD | 36  | Male   | IV        | wt           | No                             | 0                               | 10             | Yes        | 18                       | Yes   |
| 36                | Mucosal | 45  | Male   | IIc       | wt           | No                             | 1                               | 5              | Yes        | 229                      | No    |
| 37                | Mucosal | 64  | Male   | NA        | wt           | No                             | 0                               | 6              | Yes        | 25                       | No    |
| 38                | Acral   | 62  | Male   | IIIa      | wt           | No                             | 0                               | 3              | Yes        | 12                       | Yes   |
| 39                | Acral   | 50  | Male   | IV        | wt           | No                             | 0                               | 5              | Yes        | 20                       | No    |
| 40                | Mucosal | 46  | Male   | IIIb      | wt           | No                             | 1                               | 3              | Yes        | 30                       | No    |
| 41                | Acral   | 27  | Male   | IIIb      | K642E        | No                             | 0                               | 3              | No         | 32                       | Yes   |
| 42                | CSD     | 58  | Female | IIIb      | K642E        | Yes                            | 3                               | 10             | Yes        | 31                       | No    |
| 43                | Mucosal | 39  | Female | NA        | wt           | No                             | 0                               | 3              | No         | 23                       | No    |
| 44                | Mucosal | 23  | Female | NA        | wt           | No                             | 0                               | 6              | No         | 22                       | No    |
| 45                | Mucosal | 56  | Female | NA        | wt           | No                             | 2                               | 4              | No         | 46                       | No    |
| 46                | Acral   | 63  | Female | IIIa      | wt           | Yes                            | 1                               | 5              | No         | 14                       | No    |
| 47                | UP      | 63  | Female | IIIc      | wt           | No                             | 0                               | NA             | NA         | 48                       | No    |
| 48                | Mucosal | 82  | Male   | IV        | wt           | Yes                            | 0                               | NA             | Yes        | 21                       | No    |
| 49                | UP      | 42  | Male   | IV        | wt           | No                             | 0                               | NA             | NA         | 10                       | Yes   |
| 50                | Acral   | 74  | Female | IIIa      | wt           | Yes                            | 2                               | 5              | Yes        | 50                       | Yes   |
| 51                | Acral   | 49  | Male   | IIIa      | wt           | No                             | 0                               | 7              | Yes        | 38                       | No    |
| 52                | Acral   | 40  | Male   | IIIc      | wt           | No                             | 1                               | 6              | Yes        | 103                      | No    |
| 53                | UP      | 32  | Female | IIIc      | wt           | No                             | 0                               | NA             | NA         | 24                       | No    |
| 54                | Acral   | 42  | Male   | Ib        | L576P        | Yes                            | 0                               | 1.5            | No         | 22                       | No    |
| 55                | Acral   | 75  | Male   | IIb       | wt           | No                             | 0                               | 5              | No         | 29                       | No    |
| 56                | Mucosal | 40  | Female | IIa       | wt           | No                             | 1                               | 3              | No         | 49                       | Yes   |
| 57                | Acral   | 69  | Male   | IIIa      | wt           | No                             | 0                               | 3              | Yes        | 27                       | Yes   |
| 58                | Acral   | 29  | Male   | IIc       | wt           | No                             | 1                               | 6              | Yes        | 27                       | No    |
| 59                | Acral   | 51  | Female | IV        | wt           | No                             | 0                               | 7.5            | Yes        | 6                        | Yes   |
| 60                | Mucosal | 44  | Male   | IV        | wt           | No                             | 3                               | 8              | Yes        | 25                       | Yes   |

Supplementary Table S1. Continued (1)

| Code <sup>a</sup> | Subtype | Age | Sex    | TNM Stage | KIT Mutation | KIT Amplification <sup>b</sup> | CD117 (IHC Scores) <sup>c</sup> | Thickness (mm) | Ulceration | Overall Survival (month) | Death |
|-------------------|---------|-----|--------|-----------|--------------|--------------------------------|---------------------------------|----------------|------------|--------------------------|-------|
| 61                | Mucosal | 50  | Female | IIc       | wt           | No                             | 0                               | 10             | Yes        | 43                       | Yes   |
| 62                | Mucosal | 69  | Female | IIc       | wt           | No                             | 1                               | 8              | Yes        | 43                       | No    |
| 63                | Acral   | 24  | Female | IV        | wt           | No                             | 0                               | 1.5            | No         | 20                       | No    |
| 64                | Acral   | 52  | Male   | IIc       | wt           | Yes                            | 0                               | 4.5            | Yes        | 23                       | No    |
| 65                | Mucosal | 61  | Male   | IIIb      | wt           | No                             | 0                               | 6              | No         | 32                       | No    |
| 66                | Acral   | 63  | Male   | IIIc      | wt           | No                             | 1                               | 6              | Yes        | 26                       | No    |
| 67                | Mucosal | 34  | Male   | IIIb      | wt           | No                             | 0                               | 1              | No         | 11                       | Yes   |
| 68                | Acral   | 51  | Female | IIIb      | wt           | No                             | 1                               | 6              | Yes        | 23                       | No    |
| 69                | Acral   | 71  | Male   | IIc       | wt           | No                             | 0                               | 8              | Yes        | 20                       | No    |
| 70                | Acral   | 53  | Female | IIIc      | wt           | No                             | 1                               | 8              | Yes        | 21                       | No    |
| 71                | Acral   | 53  | Female | IV        | wt           | No                             | 0                               | 3.5            | No         | 12                       | Yes   |
| 72                | Acral   | 42  | Female | IIc       | wt           | No                             | 1                               | 5              | Yes        | 28                       | No    |
| 73                | Mucosal | 51  | Female | IIc       | wt           | No                             | 0                               | 8              | Yes        | 42                       | No    |
| 74                | Acral   | 59  | Female | IV        | wt           | Yes                            | 1                               | 6              | Yes        | 9                        | Yes   |
| 75                | Mucosal | 49  | Female | IIIa      | wt           | No                             | 0                               | 5              | Yes        | 54                       | No    |
| 76                | CSD     | 56  | Male   | NA        | wt           | No                             | 0                               | 8              | No         | 31                       | No    |
| 77                | Acral   | 79  | Female | NA        | wt           | No                             | 0                               | NA             | NA         | 57                       | No    |
| 78                | Mucosal | 62  | Female | IV        | wt           | No                             | 0                               | 6              | No         | 8                        | Yes   |
| 79                | Mucosal | 51  | Female | NA        | wt           | No                             | 0                               | 10             | Yes        | 33                       | No    |
| 80                | CSD     | 36  | Male   | IIb       | wt           | No                             | 0                               | 9              | No         | 18                       | No    |
| 81                | Acral   | 69  | Female | IIc       | wt           | No                             | 1                               | 10             | Yes        | 42                       | Yes   |
| 82                | Mucosal | 45  | Male   | IIb       | wt           | No                             | 0                               | 5              | No         | 79                       | Yes   |
| 83                | Acral   | 46  | Female | IIIa      | wt           | No                             | 0                               | 3.5            | Yes        | 30                       | No    |
| 84                | Mucosal | 49  | Male   | IIb       | wt           | No                             | 0                               | 8              | No         | 56                       | No    |
| 85                | Non-CSD | 49  | Female | IIIc      | wt           | No                             | 1                               | 7              | No         | 108                      | Yes   |
| 86                | Mucosal | 57  | Male   | IIIa      | wt           | No                             | 0                               | 8              | No         | 24                       | Yes   |
| 87                | UP      | 71  | Male   | IV        | wt           | No                             | 0                               | NA             | NA         | 12                       | Yes   |
| 88                | Acral   | 28  | Female | Ia        | wt           | No                             | 0                               | 0.8            | No         | 18                       | No    |
| 89                | CSD     | 34  | Female | IV        | wt           | No                             | 1                               | 5              | Yes        | 14                       | Yes   |
| 90                | Non-CSD | 67  | Female | IV        | wt           | No                             | 0                               | 1              | No         | 18                       | Yes   |
| 91                | Acral   | 57  | Male   | IIc       | wt           | No                             | 0                               | 4.5            | Yes        | 18                       | No    |
| 92                | Non-CSD | 47  | Female | IIIc      | wt           | No                             | 1                               | 5              | Yes        | 18                       | No    |
| 93                | Acral   | 35  | Female | IV        | wt           | No                             | 0                               | 5              | Yes        | 18                       | No    |
| 94                | Non-CSD | 49  | Female | IIIb      | wt           | No                             | 1                               | 5              | No         | 12                       | Yes   |
| 95                | Mucosal | 55  | Male   | IV        | wt           | No                             | 1                               | 5              | Yes        | 24                       | Yes   |
| 96                | Acral   | 32  | Female | NA        | wt           | No                             | 0                               | 0.5            | No         | 19                       | Yes   |
| 97                | Non-CSD | 43  | Female | NA        | wt           | No                             | 0                               | 4.5            | Yes        | 56                       | No    |
| 98                | Acral   | 68  | Male   | Ib        | wt           | No                             | 0                               | 1.5            | No         | 114                      | No    |
| 99                | Mucosal | 70  | Female | NA        | wt           | No                             | 0                               | 5              | No         | 24                       | No    |
| 100               | Acral   | 64  | Female | IV        | wt           | No                             | 1                               | 5              | Yes        | 14                       | No    |
| 101               | CSD     | 58  | Female | IIIa      | wt           | No                             | 0                               | 6              | No         | 12                       | No    |
| 102               | Acral   | 54  | Female | IIa       | wt           | Yes                            | 0                               | 3              | No         | 15                       | No    |
| 103               | Mucosal | 50  | Male   | IIIb      | wt           | Yes                            | 0                               | 4              | No         | 12                       | No    |
| 104               | Mucosal | 58  | Female | IV        | wt           | No                             | 0                               | 7              | No         | 19                       | Yes   |
| 105               | Mucosal | 54  | Male   | IIc       | wt           | No                             | 1                               | 4.5            | Yes        | 18                       | No    |
| 106               | Acral   | 45  | Male   | IV        | wt           | No                             | 0                               | 6              | No         | 9                        | Yes   |
| 107               | Non-CSD | 46  | Male   | IV        | wt           | No                             | 0                               | 7              | Yes        | 27                       | No    |
| 108               | Mucosal | 41  | Female | IV        | wt           | No                             | 1                               | 5              | Yes        | 9                        | Yes   |
| 109               | Acral   | 76  | Female | IIIc      | wt           | No                             | 0                               | 3.5            | No         | 29                       | No    |
| 110               | Mucosal | 70  | Female | IIa       | wt           | No                             | 0                               | 3              | No         | 23                       | No    |
| 111               | Mucosal | 53  | Male   | IIc       | wt           | No                             | 1                               | 4.5            | Yes        | 31                       | No    |
| 112               | Mucosal | 55  | Female | IIIc      | wt           | No                             | 0                               | 4.5            | No         | 23                       | Yes   |
| 113               | Acral   | 65  | Female | IIc       | wt           | No                             | 0                               | 6              | Yes        | 19                       | No    |
| 114               | Non-CSD | 44  | Male   | IIIb      | wt           | No                             | 1                               | 5              | No         | 29                       | No    |
| 115               | Acral   | 82  | Male   | IIc       | wt           | No                             | 0                               | 9              | Yes        | 73                       | No    |
| 116               | Mucosal | 41  | Male   | IIc       | wt           | No                             | 0                               | 5              | Yes        | 23                       | No    |
| 117               | Non-CSD | 72  | Male   | IIIc      | wt           | No                             | 2                               | 5              | Yes        | 18                       | Yes   |
| 118               | Acral   | 52  | Female | Ia        | wt           | No                             | 1                               | 1              | No         | 17                       | No    |
| 119               | CSD     | 63  | Male   | IIIc      | wt           | No                             | 0                               | 10             | Yes        | 49                       | No    |
| 120               | Acral   | 72  | Female | IIc       | wt           | No                             | 0                               | 6              | Yes        | 18                       | No    |

Supplementary Table S1. Continued (2)

| Code <sup>a</sup> | Subtype | Age | Sex    | TNM Stage | K/IT Mutation | KIT Amplification <sup>b</sup> | CD117 (IHC Scores) <sup>c</sup> | Thickness (mm) | Ulceration | Overall Survival (month) | Death |
|-------------------|---------|-----|--------|-----------|---------------|--------------------------------|---------------------------------|----------------|------------|--------------------------|-------|
| 121               | Acral   | 52  | Male   | IV        | wt            | No                             | 0                               | 2              | No         | 18                       | No    |
| 122               | Mucosal | 44  | Male   | IV        | wt            | No                             | 1                               | 3.5            | Yes        | 13                       | No    |
| 123               | Mucosal | 62  | Female | IIb       | wt            | No                             | 1                               | 4.5            | No         | 77                       | Yes   |
| 124               | Mucosal | 38  | Female | IV        | N822K         | No                             | 0                               | 5              | Yes        | 17                       | No    |
| 125               | Acral   | 60  | Male   | NA        | wt            | No                             | 0                               | 8              | No         | 16                       | No    |
| 126               | UP      | 54  | Male   | IIIc      | wt            | No                             | 0                               | NA             | NA         | 16                       | No    |
| 127               | Acral   | 71  | Male   | IIIb      | wt            | No                             | 0                               | 3              | Yes        | 37                       | No    |
| 128               | UP      | 68  | Female | IV        | wt            | No                             | 0                               | NA             | NA         | 6                        | Yes   |
| 129               | Acral   | 69  | Male   | NA        | wt            | No                             | 0                               | 4              | No         | 33                       | No    |
| 130               | Mucosal | 50  | Female | IV        | wt            | No                             | 0                               | 4              | No         | 25                       | Yes   |
| 131               | Mucosal | 42  | Female | IV        | wt            | No                             | 0                               | 5              | Yes        | 10                       | Yes   |
| 132               | Mucosal | 69  | Female | NA        | wt            | No                             | 0                               | 6              | Yes        | 47                       | No    |
| 133               | Acral   | 60  | Female | IIa       | wt            | No                             | 0                               | 1.5            | Yes        | 16                       | No    |
| 134               | Acral   | 57  | Male   | IV        | wt            | No                             | 0                               | 4              | No         | 10                       | Yes   |
| 135               | UP      | 62  | Female | IV        | wt            | No                             | 0                               | NA             | NA         | 29                       | No    |
| 136               | Acral   | 57  | Female | IIb       | wt            | No                             | 0                               | 4              | Yes        | 41                       | Yes   |
| 137               | Acral   | 63  | Male   | IIIc      | wt            | No                             | 0                               | 5              | No         | 62                       | No    |
| 138               | Mucosal | 33  | Male   | IV        | wt            | No                             | 3                               | 4.5            | Yes        | 25                       | Yes   |
| 139               | UP      | 54  | Female | IIIc      | wt            | No                             | 0                               | NA             | NA         | 29                       | Yes   |
| 140               | Non-CSD | 57  | Female | IIIa      | K642E         | No                             | 0                               | 6              | Yes        | 18                       | Yes   |
| 141               | Non-CSD | 82  | Male   | IIIc      | wt            | No                             | 0                               | NA             | NA         | 29                       | Yes   |
| 142               | Acral   | 57  | Female | IV        | F848L         | No                             | 0                               | 4              | No         | 20                       | Yes   |
| 143               | Acral   | 49  | Male   | IIa       | wt            | No                             | 1                               | 3              | No         | 31                       | No    |
| 144               | Acral   | 47  | Female | IIIc      | wt            | No                             | 0                               | NA             | NA         | 17                       | No    |
| 145               | Acral   | 49  | Male   | IIa       | wt            | No                             | 1                               | 3.5            | No         | 31                       | No    |
| 146               | Acral   | 45  | Female | IIIa      | N566D;A829V   | No                             | 0                               | 4              | No         | 10                       | Yes   |
| 147               | CSD     | 52  | Female | IIIa      | wt            | No                             | 0                               | 3              | Yes        | 18                       | Yes   |
| 148               | CSD     | 52  | Female | IIIa      | wt            | No                             | 1                               | 1.5            | Yes        | 27                       | Yes   |
| 149               | Acral   | 81  | Male   | IIc       | wt            | No                             | 0                               | 9              | Yes        | 73                       | No    |
| 150               | UP      | 44  | Female | IIIb      | wt            | No                             | 2                               | NA             | NA         | 24                       | No    |
| 151               | Acral   | 38  | Female | IV        | L637L;G648S   | No                             | 0                               | 3              | No         | 13                       | Yes   |
| 152               | Acral   | 70  | Male   | IIIc      | wt            | No                             | 0                               | 5              | Yes        | 29                       | No    |
| 153               | Acral   | 55  | Female | IV        | wt            | No                             | 1                               | 3              | Yes        | 27                       | Yes   |
| 154               | Acral   | 32  | Male   | NA        | wt            | No                             | 1                               | 8              | No         | 59                       | No    |
| 155               | Mucosal | 79  | Female | IIa       | wt            | No                             | 0                               | 2              | Yes        | 16                       | No    |
| 156               | CSD     | 70  | Female | IV        | wt            | No                             | 0                               | 9              | No         | 21                       | No    |
| 157               | Acral   | 50  | Male   | IIc       | wt            | No                             | 0                               | 10             | Yes        | 30                       | No    |
| 158               | Acral   | 71  | Female | NA        | wt            | Yes                            | 1                               | 5              | Yes        | 8                        | Yes   |
| 159               | Acral   | 74  | Female | IIIc      | wt            | No                             | 0                               | 4              | Yes        | 17                       | No    |
| 160               | Acral   | 64  | Female | IIc       | wt            | No                             | 0                               | 7              | Yes        | 16                       | No    |
| 161               | Mucosal | 41  | Male   | IV        | wt            | No                             | 1                               | 7              | Yes        | 15                       | No    |
| 162               | Acral   | 63  | Female | IIIc      | wt            | No                             | 1                               | 1              | No         | 150                      | Yes   |
| 163               | Mucosal | 38  | Male   | IIb       | wt            | No                             | 2                               | 7              | No         | 43                       | No    |
| 164               | Acral   | 66  | Male   | IIc       | wt            | No                             | 0                               | 8              | Yes        | 16                       | No    |
| 165               | CSD     | 74  | Male   | IIb       | wt            | No                             | 0                               | 5              | No         | 53                       | Yes   |
| 166               | Mucosal | 28  | Male   | IIb       | wt            | No                             | 1                               | 6              | No         | 89                       | No    |
| 167               | Acral   | 62  | Male   | IIIa      | wt            | No                             | 0                               | 4.5            | No         | 43                       | No    |
| 168               | Acral   | 51  | Female | IIc       | wt            | No                             | 1                               | 5              | Yes        | 124                      | Yes   |
| 169               | Mucosal | 54  | Male   | NA        | wt            | No                             | 0                               | 5              | No         | 32                       | No    |
| 170               | Acral   | 47  | Male   | IV        | wt            | No                             | 1                               | 2              | No         | 28                       | No    |
| 171               | Mucosal | 52  | Female | NA        | wt            | No                             | 1                               | 2              | Yes        | 21                       | No    |
| 172               | Acral   | 36  | Male   | NA        | wt            | Yes                            | 1                               | 1              | No         | 15                       | Yes   |
| 173               | Acral   | 54  | Male   | IIIb      | wt            | No                             | 1                               | 10             | Yes        | 108                      | Yes   |
| 174               | UP      | 41  | Female | IIIa      | wt            | No                             | 0                               | NA             | NA         | 24                       | No    |
| 175               | Non-CSD | 27  | Male   | IIIc      | wt            | Yes                            | 0                               | 6              | Yes        | 62                       | Yes   |
| 176               | UP      | 31  | Female | IV        | wt            | No                             | 0                               | NA             | NA         | 13                       | No    |
| 177               | Non-CSD | 23  | Female | IV        | L831P         | No                             | 1                               | 3              | No         | 15                       | No    |
| 178               | Mucosal | 44  | Female | NA        | wt            | No                             | 0                               | 3.5            | Yes        | 21                       | No    |
| 179               | Mucosal | 58  | Female | IV        | wt            | No                             | 0                               | 5              | No         | 10                       | Yes   |
| 180               | Mucosal | 48  | Female | IIc       | wt            | No                             | 0                               | 5              | Yes        | 15                       | No    |

Supplementary Table S1. Continued (3)

| Code <sup>a</sup> | Subtype | Age | Sex    | TNM Stage | KIT Mutation | KIT Amplification <sup>b</sup> | CD117 (IHC Scores) <sup>c</sup> | Thickness (mm) | Ulceration | Overall Survival (month) | Death |
|-------------------|---------|-----|--------|-----------|--------------|--------------------------------|---------------------------------|----------------|------------|--------------------------|-------|
| 181               | Acral   | 76  | Male   | I1c       | I817T        | No                             | 0                               | 5              | Yes        | 57                       | No    |
| 182               | Mucosal | 65  | Male   | I1a       | wt           | No                             | 1                               | 2              | Yes        | 41                       | No    |
| 183               | Mucosal | 48  | Female | I1b       | wt           | No                             | 0                               | 3.5            | Yes        | 33                       | No    |
| 184               | Acral   | 27  | Male   | I1c       | wt           | No                             | 0                               | 4.5            | Yes        | 34                       | No    |
| 185               | Mucosal | 52  | Female | NA        | wt           | No                             | 3                               | 1.5            | No         | 33                       | No    |
| 186               | Mucosal | 50  | Male   | III       | wt           | No                             | 0                               | NA             | NA         | 22                       | Yes   |
| 187               | Mucosal | 54  | Female | IIIb      | wt           | No                             | 1                               | 10             | Yes        | 50                       | No    |
| 188               | UP      | 68  | Female | IIIc      | wt           | No                             | 1                               | NA             | NA         | 132                      | No    |
| 189               | Non-CSD | 57  | Female | IV        | wt           | No                             | 0                               | 1              | No         | 9                        | Yes   |
| 190               | Mucosal | 37  | Male   | IIIc      | wt           | No                             | 1                               | 8              | Yes        | 36                       | No    |
| 191               | Mucosal | 61  | Male   | NA        | wt           | No                             | 0                               | 10             | Yes        | 30                       | No    |
| 192               | Acral   | 70  | Male   | I1b       | wt           | No                             | 1                               | 3              | Yes        | 15                       | No    |
| 193               | Mucosal | 35  | Male   | IV        | wt           | No                             | 0                               | 5              | No         | 10                       | Yes   |
| 194               | Acral   | 70  | Male   | I1c       | wt           | No                             | 0                               | 6              | Yes        | 43                       | No    |
| 195               | Acral   | 43  | Female | I1c       | wt           | No                             | 0                               | 6              | Yes        | 15                       | No    |
| 196               | UP      | 49  | Male   | III       | wt           | No                             | 1                               | NA             | NA         | 55                       | No    |
| 197               | Mucosal | 38  | Male   | IV        | wt           | No                             | 1                               | 10             | Yes        | 20                       | No    |
| 198               | Acral   | 55  | Male   | I1b       | Y553N        | No                             | 1                               | 2.5            | Yes        | 15                       | No    |
| 199               | Non-CSD | 34  | Male   | IV        | wt           | No                             | 0                               | 7              | No         | 15                       | No    |
| 200               | UP      | 44  | Male   | IV        | wt           | No                             | 0                               | NA             | NA         | 14                       | Yes   |
| 201               | Acral   | 48  | Female | NA        | wt           | No                             | 0                               | 3              | Yes        | 29                       | No    |
| 202               | Mucosal | 43  | Female | NA        | wt           | No                             | 1                               | 8              | Yes        | 33                       | No    |
| 203               | CSD     | 58  | Female | IV        | V555I        | No                             | 0                               | 10             | Yes        | 18                       | Yes   |
| 204               | Mucosal | 41  | Male   | IIIa      | wt           | No                             | 0                               | 5              | No         | 36                       | Yes   |
| 205               | Acral   | 59  | Male   | I1c       | wt           | No                             | 0                               | 6              | Yes        | 44                       | No    |
| 206               | Acral   | 71  | Male   | I1c       | wt           | No                             | 1                               | 6              | Yes        | 14                       | No    |
| 207               | Acral   | 30  | Male   | I1c       | wt           | No                             | 0                               | 8              | Yes        | 15                       | No    |
| 208               | Non-CSD | 75  | Female | IV        | wt           | No                             | 1                               | 4              | Yes        | 24                       | Yes   |
| 209               | UP      | 63  | Female | IV        | wt           | No                             | 0                               | NA             | NA         | 15                       | No    |
| 210               | Mucosal | 60  | Male   | NA        | wt           | No                             | 0                               | 4              | Yes        | 42                       | No    |
| 211               | Mucosal | 55  | Female | Ib        | wt           | No                             | 0                               | 1              | Yes        | 20                       | No    |
| 212               | Mucosal | 77  | Male   | I1b       | wt           | No                             | 2                               | 5              | No         | 33                       | No    |
| 213               | UP      | 59  | Female | IIIa      | wt           | No                             | 0                               | NA             | NA         | 14                       | No    |
| 214               | Mucosal | 66  | Male   | I1c       | wt           | No                             | 0                               | 7              | Yes        | 16                       | No    |
| 215               | Acral   | 77  | Male   | IIIa      | wt           | No                             | 1                               | 10             | Yes        | 38                       | No    |
| 216               | Acral   | 74  | Male   | IV        | wt           | No                             | 0                               | 3              | Yes        | 11                       | Yes   |
| 217               | Acral   | 63  | Female | NA        | E633G        | No                             | 0                               | 7              | Yes        | 16                       | No    |
| 218               | Mucosal | 59  | Male   | I1b       | Q556R        | No                             | 0                               | 2.5            | Yes        | 14                       | No    |
| 219               | Non-CSD | 58  | Female | IIIc      | wt           | No                             | 0                               | 4              | Yes        | 22                       | No    |
| 220               | Acral   | 33  | Male   | I1c       | wt           | No                             | 1                               | 10             | Yes        | 24                       | No    |
| 221               | UP      | 53  | Male   | IV        | wt           | No                             | 1                               | NA             | NA         | 14                       | No    |
| 222               | Non-CSD | 58  | Female | NA        | wt           | No                             | 0                               | 10             | Yes        | 18                       | No    |
| 223               | Non-CSD | 79  | Male   | IV        | wt           | No                             | 0                               | 4              | No         | 14                       | No    |
| 224               | Acral   | 56  | Male   | Ia        | wt           | No                             | 0                               | 0.5            | No         | 56                       | No    |
| 225               | Acral   | 60  | Male   | IIIb      | wt           | No                             | 0                               | 5              | No         | 21                       | No    |
| 226               | Acral   | 46  | Male   | I1b       | wt           | No                             | 1                               | 3              | Yes        | 20                       | No    |
| 227               | UP      | 58  | Female | NA        | wt           | No                             | 2                               | NA             | NA         | 27                       | No    |
| 228               | Acral   | 34  | Female | Ib        | wt           | No                             | 2                               | 2              | No         | 24                       | No    |
| 229               | Mucosal | 78  | Male   | NA        | wt           | No                             | 0                               | 2              | No         | 21                       | No    |
| 230               | Mucosal | 34  | Male   | NA        | wt           | No                             | 0                               | 8              | No         | 20                       | No    |
| 231               | Acral   | 50  | Female | IIIc      | wt           | No                             | 0                               | 10             | Yes        | 16                       | No    |
| 232               | Non-CSD | 57  | Female | IV        | wt           | No                             | 0                               | 8              | Yes        | 13                       | No    |
| 233               | Non-CSD | 57  | Female | IIIc      | wt           | No                             | 0                               | 8              | No         | 19                       | No    |
| 234               | Acral   | 57  | Male   | NA        | wt           | No                             | 0                               | 5              | No         | 36                       | No    |
| 235               | CSD     | 54  | Female | I1c       | wt           | No                             | 1                               | 6              | Yes        | 51                       | Yes   |
| 236               | Mucosal | 24  | Female | IV        | wt           | No                             | 0                               | 4              | Yes        | 12                       | Yes   |
| 237               | Non-CSD | 47  | Female | IV        | wt           | No                             | 1                               | 4              | No         | 15                       | Yes   |
| 238               | Acral   | 47  | Female | IV        | wt           | No                             | 3                               | 3              | No         | 13                       | No    |
| 239               | Acral   | 47  | Female | IV        | wt           | No                             | 1                               | 2              | No         | 13                       | No    |
| 240               | Acral   | 54  | Male   | I1c       | wt           | No                             | 0                               | 5              | Yes        | 20                       | No    |

Supplementary Table S1. Continued (4)

| Code <sup>a</sup> | Subtype | Age | Sex    | TNM Stage | KIT Mutation | KIT Amplification <sup>b</sup> | CD117 (IHC Scores) <sup>c</sup> | Thickness (mm) | Ulceration | Overall Survival (month) | Death |
|-------------------|---------|-----|--------|-----------|--------------|--------------------------------|---------------------------------|----------------|------------|--------------------------|-------|
| 241               | Acral   | 72  | Female | NA        | wt           | No                             | 0                               | 0.5            | No         | 16                       | No    |
| 242               | Mucosal | 69  | Female | IIc       | wt           | No                             | 0                               | 5.5            | Yes        | 16                       | No    |
| 243               | Acral   | 64  | Female | NA        | wt           | No                             | 1                               | 2              | No         | 15                       | No    |
| 244               | Acral   | 70  | Female | NA        | wt           | No                             | 1                               | 1              | Yes        | 15                       | No    |
| 245               | Mucosal | 45  | Female | NA        | W853stop     | No                             | 3                               | 4              | No         | 13                       | No    |
| 246               | Acral   | 41  | Male   | IIIc      | wt           | No                             | 0                               | 1              | No         | 34                       | No    |
| 247               | CSD     | 55  | Male   | NA        | wt           | No                             | 1                               | 10             | Yes        | 23                       | No    |
| 248               | CSD     | 81  | Male   | IIc       | wt           | No                             | 1                               | 9              | Yes        | 33                       | No    |
| 249               | Acral   | 44  | Male   | IIa       | L859P;L865L  | No                             | 2                               | 4              | No         | 32                       | Yes   |
| 250               | Mucosal | 34  | Male   | NA        | wt           | No                             | 0                               | 4              | Yes        | 25                       | No    |
| 251               | Non-CSD | 50  | Male   | IV        | wt           | No                             | 1                               | 6              | Yes        | 14                       | No    |
| 252               | Acral   | 37  | Male   | IIIc      | wt           | No                             | 1                               | 5              | No         | 15                       | No    |
| 253               | Mucosal | 61  | Male   | IV        | wt           | No                             | 0                               | 4              | Yes        | 18                       | No    |
| 254               | Mucosal | 39  | Female | NA        | wt           | Yes                            | 1                               | 7              | No         | 15                       | No    |
| 255               | CSD     | 34  | Male   | IIb       | wt           | No                             | 0                               | 3              | Yes        | 13                       | Yes   |
| 256               | Mucosal | 35  | Female | IIc       | L647F        | No                             | 1                               | 8              | Yes        | 15                       | No    |
| 257               | Mucosal | 39  | Female | IIIb      | wt           | No                             | 0                               | 4              | Yes        | 16                       | No    |
| 258               | Non-CSD | 37  | Female | IV        | wt           | No                             | 0                               | 2              | No         | 15                       | No    |
| 259               | Mucosal | 62  | Female | IIIa      | wt           | No                             | 1                               | 5              | Yes        | 13                       | No    |
| 260               | UP      | 83  | Female | NA        | wt           | No                             | 0                               | NA             | NA         | 27                       | No    |
| 261               | Acral   | 73  | Female | IIIc      | wt           | No                             | 0                               | 2.5            | Yes        | 14                       | No    |
| 262               | Acral   | 43  | Female | IIc       | wt           | No                             | 0                               | 5              | Yes        | 13                       | No    |
| 263               | Acral   | 72  | Female | IIa       | W582stop     | No                             | 1                               | 1.5            | Yes        | 33                       | Yes   |
| 264               | CSD     | 76  | Male   | IIc       | wt           | No                             | 0                               | 4.5            | Yes        | 43                       | No    |
| 265               | Non-CSD | 32  | Female | IV        | wt           | No                             | 0                               | 4              | Yes        | 13                       | No    |
| 266               | UP      | 61  | Male   | IV        | wt           | No                             | 0                               | NA             | NA         | 6                        | Yes   |
| 267               | Acral   | 63  | Female | IIc       | wt           | No                             | 0                               | 6              | Yes        | 52                       | Yes   |
| 268               | CSD     | 57  | Female | Ia        | wt           | No                             | 0                               | 0.5            | No         | 16                       | No    |
| 269               | Acral   | 30  | Male   | IIb       | wt           | No                             | 0                               | 5              | No         | 12                       | No    |
| 270               | Acral   | 58  | Male   | IV        | wt           | No                             | 1                               | 1              | No         | 13                       | No    |
| 271               | CSD     | 63  | Male   | IIIc      | I571M        | No                             | 0                               | 4              | No         | 25                       | No    |
| 272               | Mucosal | 77  | Female | NA        | wt           | No                             | 0                               | 1.5            | No         | 12                       | No    |
| 273               | Acral   | 64  | Male   | IV        | K642E        | No                             | 0                               | 4              | No         | 12                       | No    |
| 274               | UP      | 75  | Male   | IV        | wt           | No                             | 0                               | NA             | NA         | 4                        | Yes   |
| 275               | CSD     | 56  | Male   | IV        | Y846H        | No                             | 0                               | 10             | Yes        | 25                       | Yes   |
| 276               | Acral   | 72  | Male   | IIIa      | wt           | No                             | 0                               | 8              | Yes        | 22                       | Yes   |
| 277               | Acral   | 40  | Female | IIIa      | wt           | No                             | 0                               | 3              | No         | 29                       | No    |
| 278               | UP      | 68  | Female | IV        | wt           | No                             | 1                               | NA             | NA         | 12                       | No    |
| 279               | Mucosal | 42  | Male   | IIa       | wt           | No                             | 0                               | 3              | No         | 13                       | No    |
| 280               | Acral   | 50  | Female | IIc       | wt           | No                             | 0                               | 10             | Yes        | 14                       | No    |
| 281               | Non-CSD | 54  | Female | IIIa      | wt           | No                             | 0                               | 10             | Yes        | 16                       | No    |
| 282               | Non-CSD | 42  | Female | IIIc      | wt           | No                             | 1                               | 4              | No         | 12                       | No    |
| 283               | Acral   | 62  | Female | IIIa      | wt           | No                             | 1                               | 1.5            | Yes        | 19                       | No    |
| 284               | Non-CSD | 39  | Female | IV        | wt           | No                             | 0                               | 6              | Yes        | 10                       | Yes   |
| 285               | Mucosal | 41  | Female | NA        | wt           | No                             | 0                               | 5              | No         | NA                       | NA    |
| 286               | Acral   | 35  | Male   | IIc       | wt           | No                             | 0                               | 6              | Yes        | 12                       | No    |
| 287               | Mucosal | 59  | Female | NA        | wt           | Yes                            | 0                               | 5.5            | No         | 10                       | No    |
| 288               | Mucosal | 74  | Female | NA        | wt           | No                             | 0                               | 3              | No         | NA                       | NA    |
| 289               | Acral   | 41  | Male   | IIIb      | wt           | No                             | 0                               | 5              | Yes        | 27                       | No    |
| 290               | CSD     | 44  | Female | IIc       | wt           | No                             | 0                               | 7              | Yes        | 12                       | No    |
| 291               | Mucosal | 62  | Female | IIIa      | wt           | No                             | 0                               | 1              | No         | 13                       | Yes   |
| 292               | CSD     | 37  | Male   | IIIc      | wt           | No                             | 1                               | 3              | Yes        | 12                       | No    |
| 293               | Acral   | 27  | Female | IIa       | wt           | No                             | 1                               | 2              | Yes        | 12                       | No    |
| 294               | UP      | 63  | Female | IV        | wt           | No                             | 1                               | NA             | NA         | NA                       | NA    |
| 295               | Acral   | 42  | Female | IV        | wt           | No                             | 0                               | 7              | Yes        | 18                       | No    |
| 296               | Acral   | 33  | Male   | IIIc      | wt           | No                             | 0                               | 6              | Yes        | 45                       | No    |
| 297               | Mucosal | 54  | Male   | IIIc      | wt           | No                             | 1                               | 9              | Yes        | 19                       | No    |
| 298               | Acral   | 69  | Female | III       | wt           | No                             | 0                               | 6              | Yes        | NA                       | NA    |
| 299               | Non-CSD | 57  | Male   | IIb       | P551L        | No                             | 1                               | 4.5            | No         | 98                       | Yes   |
| 300               | Non-CSD | 48  | Male   | IIIc      | wt           | No                             | 1                               | 1.5            | Yes        | 13                       | No    |

Supplementary Table S1. Continued (5)

| Code <sup>a</sup> | Subtype | Age | Sex    | TNM Stage | KIT Mutation | KIT Amplification <sup>b</sup> | CD117 (IHC Scores) <sup>c</sup> | Thickness (mm) | Ulceration | Overall Survival (month) | Death |
|-------------------|---------|-----|--------|-----------|--------------|--------------------------------|---------------------------------|----------------|------------|--------------------------|-------|
| 301               | Non-CSD | 33  | Male   | IIla      | wt           | No                             | 0                               | 10             | Yes        | 13                       | No    |
| 302               | Mucosal | 44  | Male   | IIb       | wt           | No                             | 1                               | 2.5            | Yes        | NA                       | NA    |
| 303               | UP      | 79  | Male   | IIla      | wt           | No                             | 0                               | NA             | NA         | 15                       | No    |
| 304               | Non-CSD | 39  | Female | IV        | wt           | No                             | 0                               | 6              | No         | NA                       | NA    |
| 305               | Acral   | 71  | Female | IIa       | wt           | No                             | 0                               | 3.5            | No         | 30                       | Yes   |
| 306               | Non-CSD | 45  | Male   | IV        | wt           | No                             | 0                               | 3              | Yes        | NA                       | NA    |
| 307               | UP      | 78  | Male   | IV        | S645N        | No                             | 0                               | NA             | NA         | 22                       | Yes   |
| 308               | Acral   | 66  | Female | IV        | wt           | No                             | 0                               | 6              | No         | 23                       | Yes   |
| 309               | Acral   | 54  | Male   | IIlb      | wt           | No                             | 0                               | 7              | Yes        | 13                       | No    |
| 310               | Acral   | 82  | Female | IIc       | wt           | No                             | 0                               | 5              | Yes        | 12                       | No    |
| 311               | Acral   | 62  | Male   | IV        | wt           | No                             | 0                               | 1              | No         | 16                       | No    |
| 312               | Acral   | 51  | Female | IIc       | I563V        | No                             | 1                               | 6              | Yes        | 53                       | Yes   |
| 313               | Mucosal | 59  | Male   | IIla      | wt           | No                             | 1                               | 6              | Yes        | 10                       | No    |
| 314               | Non-CSD | 58  | Female | IV        | T632I;L637F  | No                             | 0                               | 10             | Yes        | 17                       | No    |
| 315               | Acral   | 53  | Female | IV        | wt           | No                             | 0                               | 6              | Yes        | NA                       | NA    |
| 316               | Non-CSD | 75  | Male   | IV        | wt           | No                             | 0                               | 6              | No         | NA                       | NA    |
| 317               | Mucosal | 35  | Male   | IV        | wt           | No                             | 0                               | 3              | No         | 12                       | No    |
| 318               | Non-CSD | 77  | Female | IIlc      | wt           | Yes                            | 0                               | 6              | No         | 23                       | No    |
| 319               | UP      | 53  | Male   | IV        | wt           | No                             | 0                               | NA             | NA         | 19                       | Yes   |
| 320               | Acral   | 55  | Male   | IV        | wt           | No                             | 3                               | 5              | No         | 12                       | Yes   |
| 321               | Mucosal | 61  | Female | IIa       | wt           | Yes                            | 0                               | 1.5            | Yes        | 11                       | No    |
| 322               | Mucosal | 62  | Male   | IIa       | wt           | No                             | 0                               | 3              | No         | 55                       | No    |
| 323               | Mucosal | 70  | Female | IV        | wt           | No                             | 0                               | 7              | Yes        | NA                       | NA    |
| 324               | Acral   | 56  | Male   | IV        | N822K        | No                             | 0                               | 3              | No         | 10                       | Yes   |
| 325               | Mucosal | 63  | Female | IV        | N822Y        | No                             | 0                               | 7.5            | Yes        | 17                       | Yes   |
| 326               | UP      | 82  | Female | III       | wt           | No                             | 0                               | NA             | NA         | 26                       | No    |
| 327               | Mucosal | 42  | Female | IV        | wt           | No                             | 0                               | 4              | Yes        | 20                       | Yes   |
| 328               | Mucosal | 56  | Female | Ia        | wt           | Yes                            | 1                               | 1              | No         | 119                      | No    |
| 329               | Mucosal | 49  | Male   | IV        | wt           | No                             | 0                               | 4              | Yes        | NA                       | NA    |
| 330               | Mucosal | 57  | Male   | NA        | E561G        | No                             | 1                               | 9              | Yes        | 21                       | No    |
| 331               | Acral   | 46  | Male   | IIa       | wt           | No                             | 0                               | 4              | No         | NA                       | NA    |
| 332               | Non-CSD | 20  | Male   | IV        | wt           | No                             | 1                               | 10             | Yes        | 9                        | Yes   |
| 333               | UP      | 56  | Male   | IIla      | wt           | No                             | 0                               | NA             | NA         | 13                       | No    |
| 334               | Acral   | 71  | Male   | IIc       | L576F;A636A  | No                             | 0                               | 10             | Yes        | 16                       | No    |
| 335               | Acral   | 54  | Male   | IIa       | L576P        | Yes                            | 1                               | 3              | No         | 17                       | No    |
| 336               | CSD     | 32  | Male   | IIlc      | L656R        | No                             | 0                               | 7              | No         | 10                       | No    |
| 337               | Mucosal | 82  | Male   | IIc       | wt           | No                             | 0                               | 5              | Yes        | 98                       | No    |
| 338               | Acral   | 55  | Male   | IIc       | W853stop     | No                             | 0                               | 4.5            | Yes        | 12                       | No    |
| 339               | Non-CSD | 66  | Male   | IV        | wt           | No                             | 1                               | 1              | No         | 14                       | Yes   |
| 340               | Mucosal | 57  | Female | IV        | wt           | No                             | 1                               | 10             | No         | 11                       | Yes   |
| 341               | Mucosal | 68  | Male   | Ia        | wt           | No                             | 1                               | 1              | No         | 10                       | No    |
| 342               | UP      | 69  | Female | IV        | wt           | No                             | 1                               | NA             | NA         | 12                       | Yes   |
| 343               | Mucosal | 44  | Female | IV        | wt           | No                             | 0                               | 1              | No         | 15                       | Yes   |
| 344               | Mucosal | 30  | Female | IV        | wt           | No                             | 0                               | 2              | No         | 10                       | No    |
| 345               | UP      | 48  | Male   | II        | wt           | No                             | 0                               | NA             | NA         | 42                       | No    |
| 346               | Acral   | 60  | Male   | IV        | wt           | No                             | 0                               | 3              | Yes        | 23                       | No    |
| 347               | Mucosal | 31  | Male   | IIa       | wt           | No                             | 1                               | 3              | No         | 50                       | Yes   |
| 348               | Non-CSD | 46  | Female | IIlc      | wt           | No                             | 2                               | 4.5            | Yes        | 10                       | No    |
| 349               | Non-CSD | 76  | Female | IV        | wt           | No                             | 0                               | 0.5            | No         | 10                       | No    |
| 350               | UP      | 37  | Female | IV        | wt           | No                             | 1                               | NA             | NA         | 10                       | Yes   |
| 351               | Mucosal | 55  | Female | IIa       | wt           | No                             | 0                               | 3.5            | No         | NA                       | NA    |
| 352               | Mucosal | 32  | Female | IIb       | wt           | No                             | 1                               | 5              | No         | 51                       | No    |
| 353               | Acral   | 43  | Female | IIc       | wt           | No                             | 0                               | 5              | Yes        | 69                       | Yes   |
| 354               | Acral   | 43  | Male   | IIb       | wt           | No                             | 0                               | 2.5            | Yes        | NA                       | NA    |
| 355               | Acral   | 46  | Male   | IV        | wt           | No                             | 0                               | 5              | Yes        | 10                       | No    |
| 356               | Mucosal | 29  | Female | Ia        | wt           | No                             | 0                               | 1              | No         | 48                       | Yes   |
| 357               | Mucosal | 28  | Male   | IIa       | E583G        | No                             | 2                               | 3.5            | No         | 22                       | No    |
| 358               | UP      | 67  | Male   | IV        | wt           | No                             | 0                               | NA             | NA         | NA                       | NA    |
| 359               | Acral   | 42  | Female | IIlb      | C844Y        | No                             | 0                               | 5              | No         | 30                       | Yes   |
| 360               | Acral   | 61  | Male   | IV        | wt           | No                             | 0                               | 1              | No         | 11                       | No    |

Supplementary Table S1. Continued (6)

| Code <sup>a</sup> | Subtype | Age | Sex    | TNM Stage | KIT Mutation | KIT Amplification <sup>b</sup> | CD117 (IHC Scores) <sup>c</sup> | Thickness (mm) | Ulceration | Overall Survival (month) | Death |
|-------------------|---------|-----|--------|-----------|--------------|--------------------------------|---------------------------------|----------------|------------|--------------------------|-------|
| 361               | Acral   | 59  | Male   | IV        | L576P        | Yes                            | 2                               | 4.5            | No         | 13                       | No    |
| 362               | UP      | 48  | Male   | IV        | L576P        | No                             | 3                               | NA             | NA         | NA                       | NA    |
| 363               | Mucosal | 69  | Female | IV        | wt           | No                             | 1                               | 10             | Yes        | 19                       | No    |
| 364               | Mucosal | 38  | Male   | Ila       | wt           | No                             | 0                               | 3              | No         | 13                       | No    |
| 365               | Acral   | 62  | Male   | IV        | wt           | No                             | 1                               | 10             | Yes        | 13                       | No    |
| 366               | Acral   | 61  | Male   | IV        | wt           | No                             | 2                               | 5              | Yes        | NA                       | NA    |
| 367               | Acral   | 59  | Male   | IIla      | wt           | No                             | 0                               | 5              | No         | 33                       | No    |
| 368               | Acral   | 55  | Male   | IV        | wt           | No                             | 0                               | 5              | Yes        | 24                       | No    |
| 369               | UP      | 54  | Male   | IV        | L576F        | No                             | 0                               | NA             | NA         | 7                        | Yes   |
| 370               | Non-CSD | 54  | Female | IIlc      | wt           | No                             | 2                               | 7              | Yes        | 8                        | No    |
| 371               | Acral   | 58  | Male   | IIc       | wt           | Yes                            | 0                               | 6.5            | Yes        | 8                        | No    |
| 372               | Acral   | 52  | Female | IV        | wt           | No                             | 3                               | 5              | Yes        | NA                       | NA    |
| 373               | Mucosal | 55  | Male   | IIb       | K642E        | No                             | 1                               | 3              | Yes        | NA                       | NA    |
| 374               | Mucosal | 60  | Female | IIb       | wt           | No                             | 1                               | 5              | No         | 9                        | No    |
| 375               | Non-CSD | 47  | Male   | IIlc      | wt           | No                             | 3                               | 5              | Yes        | 11                       | No    |
| 376               | Non-CSD | 56  | Female | IV        | wt           | No                             | 0                               | 10             | Yes        | 10                       | No    |
| 377               | Acral   | 37  | Male   | IIIB      | wt           | No                             | 3                               | 5              | Yes        | 11                       | No    |
| 378               | Acral   | 59  | Female | IIc       | wt           | No                             | 2                               | 4.5            | Yes        | 9                        | No    |
| 379               | Non-CSD | 52  | Male   | IV        | wt           | No                             | 1                               | 4              | Yes        | 20                       | Yes   |
| 380               | Acral   | 70  | Male   | IIlc      | wt           | No                             | 0                               | 5              | Yes        | 23                       | No    |
| 381               | Non-CSD | 49  | Female | IV        | wt           | No                             | 2                               | 10             | Yes        | 12                       | No    |
| 382               | Mucosal | 41  | Male   | IV        | wt           | No                             | 0                               | 6              | Yes        | 11                       | No    |
| 383               | Mucosal | 60  | Male   | IIb       | wt           | No                             | 0                               | 4              | Yes        | 11                       | No    |
| 384               | Acral   | 36  | Female | IV        | wt           | No                             | 1                               | 3              | Yes        | 8                        | No    |
| 385               | Acral   | 54  | Male   | IIlc      | L576P        | No                             | 0                               | 9              | No         | 65                       | No    |
| 386               | UP      | 34  | Male   | IV        | wt           | No                             | 3                               | NA             | NA         | 10                       | Yes   |
| 387               | Mucosal | 67  | Male   | IV        | wt           | No                             | 0                               | 3              | No         | 10                       | No    |
| 388               | Acral   | 22  | Female | IIlc      | wt           | No                             | 0                               | 6              | No         | 35                       | No    |
| 389               | Mucosal | 39  | Female | IV        | wt           | Yes                            | 1                               | 10             | Yes        | 11                       | Yes   |
| 390               | Mucosal | 49  | Female | IV        | L576P        | No                             | 0                               | 2              | No         | 21                       | Yes   |
| 391               | Non-CSD | 60  | Female | IV        | wt           | No                             | 0                               | 10             | Yes        | NA                       | NA    |
| 392               | Mucosal | 57  | Female | IIc       | wt           | No                             | 3                               | 10             | Yes        | 95                       | No    |
| 393               | CSD     | 54  | Female | Ila       | wt           | No                             | 1                               | 2              | Yes        | 44                       | No    |
| 394               | Mucosal | 77  | Female | IIIB      | wt           | No                             | 3                               | 5              | No         | 33                       | No    |
| 395               | Mucosal | 73  | Female | IIc       | wt           | No                             | 1                               | 7              | Yes        | 9                        | No    |
| 396               | Acral   | 56  | Female | Ib        | wt           | No                             | 1                               | 1.5            | No         | 34                       | No    |
| 397               | Mucosal | 56  | Female | IV        | wt           | No                             | 2                               | 4.5            | Yes        | 12                       | No    |
| 398               | Acral   | 63  | Male   | IV        | wt           | Yes                            | 3                               | 3.5            | No         | 9                        | No    |
| 399               | Acral   | 87  | Female | IIlc      | wt           | No                             | 0                               | 7              | No         | 13                       | No    |
| 400               | Acral   | 43  | Female | IIc       | wt           | Yes                            | 1                               | 7.5            | Yes        | NA                       | NA    |
| 401               | Acral   | 84  | Female | IV        | wt           | No                             | 0                               | 2.5            | Yes        | 18                       | No    |
| 402               | Mucosal | 55  | Female | IIc       | wt           | Yes                            | 2                               | 5              | Yes        | 7                        | No    |
| 403               | Mucosal | 81  | Female | IIb       | wt           | No                             | 0                               | 4              | Yes        | NA                       | NA    |
| 404               | Acral   | 70  | Male   | IV        | wt           | No                             | 0                               | 5              | Yes        | 15                       | Yes   |
| 405               | CSD     | 45  | Female | IIlc      | wt           | No                             | 0                               | 7              | Yes        | 29                       | No    |
| 406               | Non-CSD | 25  | Male   | IV        | wt           | No                             | 2                               | 4              | No         | NA                       | NA    |
| 407               | Non-CSD | 56  | Female | IIlc      | wt           | No                             | 0                               | 0.5            | No         | 28                       | No    |
| 408               | Mucosal | 33  | Female | IIb       | wt           | No                             | 0                               | 3              | Yes        | 62                       | No    |
| 409               | Mucosal | 36  | Female | IIlc      | wt           | Yes                            | 3                               | 5              | Yes        | 13                       | No    |
| 410               | Mucosal | 41  | Female | IV        | wt           | No                             | 0                               | 10             | Yes        | NA                       | NA    |
| 411               | Mucosal | 71  | Female | IIb       | wt           | No                             | 1                               | 2.5            | Yes        | 8                        | No    |
| 412               | Mucosal | 70  | Female | IV        | wt           | Yes                            | 0                               | 10             | Yes        | 7                        | No    |
| 413               | Acral   | 63  | Female | NA        | wt           | No                             | 0                               | 3              | No         | 24                       | Yes   |
| 414               | Mucosal | 66  | Female | IIb       | wt           | No                             | 0                               | 7              | No         | 7                        | No    |
| 415               | Acral   | 50  | Male   | III       | wt           | No                             | 1                               | NA             | NA         | NA                       | NA    |
| 416               | Non-CSD | 56  | Female | IV        | wt           | No                             | 1                               | 1.5            | Yes        | 18                       | No    |
| 417               | Mucosal | 37  | Male   | IV        | wt           | Yes                            | 3                               | 5              | No         | 14                       | No    |
| 418               | Non-CSD | 45  | Male   | IIIB      | wt           | No                             | 0                               | 4              | Yes        | NA                       | NA    |
| 419               | Acral   | 71  | Female | IIlc      | wt           | No                             | 1                               | 5              | Yes        | 12                       | No    |
| 420               | UP      | 59  | Male   | IV        | wt           | No                             | 0                               | NA             | NA         | 9                        | Yes   |

Supplementary Table S1. Continued (7)

| Code <sup>a</sup> | Subtype | Age | Sex    | TNM Stage | KIT Mutation | KIT Amplification <sup>b</sup> | CD117 (IHC Scores) <sup>c</sup> | Thickness (mm) | Ulceration | Overall Survival (month) | Death |
|-------------------|---------|-----|--------|-----------|--------------|--------------------------------|---------------------------------|----------------|------------|--------------------------|-------|
| 421               | Mucosal | 41  | Female | IV        | D816N        | No                             | 1                               | 3              | Yes        | 12                       | Yes   |
| 422               | Acral   | 70  | Male   | IIc       | wt           | No                             | 0                               | 5              | Yes        | 7                        | No    |
| 423               | UP      | 58  | Male   | IV        | wt           | No                             | 0                               | NA             | NA         | 5                        | Yes   |
| 424               | Mucosal | 74  | Male   | IIa       | wt           | No                             | 0                               | 3              | No         | 8                        | No    |
| 425               | Acral   | 44  | Female | IIc       | wt           | No                             | 0                               | 4.5            | Yes        | 7                        | No    |
| 426               | Acral   | 40  | Female | IIb       | wt           | No                             | 1                               | 5              | No         | 45                       | Yes   |
| 427               | Mucosal | 80  | Male   | Ib        | wt           | No                             | 1                               | 1.5            | No         | 7                        | No    |
| 428               | Non-CSD | 61  | Female | IV        | wt           | No                             | 0                               | 2              | No         | 13                       | No    |
| 429               | Acral   | 72  | Female | IIb       | wt           | No                             | 0                               | 4.5            | No         | 7                        | No    |
| 430               | Acral   | 71  | Male   | IIIb      | wt           | No                             | 0                               | 7              | Yes        | 34                       | Yes   |
| 431               | CSD     | 47  | Female | IIc       | wt           | No                             | 1                               | 4.5            | Yes        | NA                       | NA    |
| 432               | Acral   | 39  | Female | IIc       | wt           | No                             | 1                               | 8              | Yes        | 7                        | No    |
| 433               | Acral   | 66  | Male   | IIa       | wt           | No                             | 0                               | 3              | No         | 8                        | No    |
| 434               | Non-CSD | 48  | Male   | IV        | wt           | No                             | 0                               | 8              | Yes        | 19                       | No    |
| 435               | Acral   | 53  | Male   | IIIc      | wt           | Yes                            | 1                               | 7              | Yes        | 29                       | No    |
| 436               | Mucosal | 38  | Female | IV        | wt           | No                             | 1                               | 5              | Yes        | 9                        | No    |
| 437               | Acral   | 68  | Male   | IIc       | L576P        | No                             | 1                               | 9              | Yes        | 7                        | No    |
| 438               | Non-CSD | 40  | Female | IV        | wt           | No                             | 0                               | 5              | Yes        | 9                        | No    |
| 439               | Acral   | 71  | Male   | IIc       | wt           | No                             | 0                               | 10             | Yes        | 7                        | No    |
| 440               | Acral   | 40  | Male   | IIIc      | wt           | No                             | 1                               | 10             | Yes        | 7                        | No    |
| 441               | Acral   | 59  | Female | IIa       | wt           | No                             | 1                               | 3              | No         | 7                        | No    |
| 442               | Mucosal | 41  | Female | IV        | wt           | No                             | 2                               | 6              | Yes        | 16                       | No    |
| 443               | Acral   | 43  | Female | IV        | wt           | No                             | 1                               | 1.5            | No         | 13                       | No    |
| 444               | UP      | 70  | Male   | IV        | wt           | No                             | 1                               | NA             | NA         | 22                       | No    |
| 445               | Acral   | 44  | Female | IIc       | wt           | No                             | 0                               | 5              | Yes        | 26                       | No    |
| 446               | UP      | 78  | Female | IV        | wt           | No                             | 0                               | NA             | NA         | NA                       | NA    |
| 447               | CSD     | 65  | Male   | IIc       | E849stop     | No                             | 0                               | 5              | Yes        | 24                       | No    |
| 448               | UP      | 59  | Female | IV        | P577H        | No                             | 0                               | NA             | NA         | 8                        | No    |
| 449               | Mucosal | 77  | Female | IIb       | wt           | No                             | 1                               | 2.5            | Yes        | 6                        | No    |
| 450               | Mucosal | 47  | Male   | IIa       | wt           | No                             | 1                               | 3              | No         | 8                        | No    |
| 451               | UP      | 64  | Male   | IV        | wt           | No                             | 1                               | NA             | NA         | 7                        | No    |
| 452               | Mucosal | 29  | Female | IIc       | wt           | No                             | 0                               | 6              | Yes        | 25                       | No    |
| 453               | Acral   | 36  | Male   | IV        | wt           | No                             | 0                               | 2              | Yes        | 7                        | No    |
| 454               | Acral   | 50  | Male   | IIIc      | wt           | No                             | 3                               | 1.5            | Yes        | 27                       | No    |
| 455               | CSD     | 78  | Male   | IIIb      | wt           | No                             | 0                               | 10             | No         | 7                        | No    |
| 456               | Mucosal | 36  | Female | IV        | wt           | No                             | 0                               | 5              | No         | 19                       | No    |
| 457               | Acral   | 50  | Male   | IIc       | wt           | No                             | 0                               | 8              | Yes        | 6                        | No    |
| 458               | Acral   | 68  | Male   | NA        | wt           | No                             | 0                               | 3              | No         | 55                       | Yes   |
| 459               | Non-CSD | 55  | Female | IV        | wt           | No                             | 0                               | 4              | Yes        | 17                       | No    |
| 460               | UP      | 52  | Male   | IV        | wt           | No                             | 0                               | NA             | NA         | 6                        | No    |
| 461               | UP      | 76  | Male   | II        | wt           | No                             | 2                               | NA             | NA         | 64                       | No    |
| 462               | Acral   | 25  | Male   | IV        | wt           | No                             | 0                               | 10             | Yes        | 13                       | No    |
| 463               | Acral   | 57  | Female | IV        | wt           | No                             | 0                               | 3              | No         | 12                       | No    |
| 464               | Acral   | 41  | Female | IIIc      | wt           | No                             | 0                               | 4              | No         | 5                        | No    |
| 465               | Mucosal | 74  | Female | IV        | wt           | No                             | 1                               | 10             | Yes        | 11                       | No    |
| 466               | Mucosal | 69  | Female | IIIa      | wt           | No                             | 1                               | 1              | No         | 37                       | No    |
| 467               | Acral   | 87  | Female | IIc       | wt           | No                             | 0                               | 5              | Yes        | 6                        | No    |
| 468               | Acral   | 39  | Female | IIIc      | wt           | No                             | 3                               | 2              | No         | 6                        | No    |
| 469               | Acral   | 30  | Female | III       | wt           | No                             | 0                               | NA             | NA         | 10                       | No    |
| 470               | Mucosal | 53  | Female | IIIc      | wt           | No                             | 0                               | 2              | No         | 12                       | No    |
| 471               | Acral   | 83  | Male   | IIc       | wt           | No                             | 1                               | 6              | Yes        | 26                       | No    |
| 472               | Mucosal | 69  | Female | IV        | L576P        | No                             | 0                               | NA             | NA         | 6                        | Yes   |
| 473               | Non-CSD | 46  | Female | IV        | wt           | No                             | 2                               | 5              | Yes        | 7                        | No    |
| 474               | Non-CSD | 75  | Female | IIIc      | wt           | No                             | 1                               | 2              | No         | 7                        | No    |
| 475               | Non-CSD | 70  | Male   | IV        | wt           | No                             | 2                               | 7              | Yes        | 8                        | No    |
| 476               | Acral   | 59  | Female | IV        | wt           | No                             | 0                               | 1.5            | No         | 9                        | No    |
| 477               | Mucosal | 50  | Female | IV        | wt           | No                             | 0                               | NA             | NA         | 25                       | No    |
| 478               | Acral   | 51  | Female | IIc       | wt           | No                             | 3                               | 7              | Yes        | 32                       | No    |
| 479               | UP      | 38  | Male   | IIIc      | wt           | No                             | 0                               | NA             | NA         | 22                       | No    |
| 480               | Non-CSD | 69  | Female | IIIc      | wt           | No                             | 0                               | 2              | No         | 8                        | No    |



Supplementary Table S1. Continued (8)

| Code <sup>a</sup> | Subtype | Age | Sex    | TNM Stage | <i>KIT</i> Mutation | <i>KIT</i> Amplification <sup>b</sup> | CD117 (IHC Scores) <sup>c</sup> | Thickness (mm) | Ulceration | Overall Survival (month) | Death |
|-------------------|---------|-----|--------|-----------|---------------------|---------------------------------------|---------------------------------|----------------|------------|--------------------------|-------|
| 481               | Non-CSD | 28  | Female | IV        | wt                  | No                                    | 0                               | 3              | No         | 13                       | No    |
| 482               | Mucosal | 26  | Female | IIc       | wt                  | Yes                                   | 2                               | 5.5            | Yes        | 29                       | No    |
| 483               | Non-CSD | 39  | Female | IV        | wt                  | No                                    | 3                               | 5              | Yes        | 8                        | No    |
| 484               | Acral   | 58  | Male   | IIc       | wt                  | No                                    | 1                               | 6              | Yes        | 18                       | No    |
| 485               | CSD     | 74  | Female | IIc       | wt                  | No                                    | 0                               | 5              | Yes        | 4                        | No    |
| 486               | Mucosal | 70  | Female | IV        | wt                  | No                                    | 0                               | 3              | No         | 8                        | No    |
| 487               | UP      | 36  | Male   | IV        | wt                  | No                                    | 0                               | NA             | NA         | 10                       | Yes   |
| 488               | Mucosal | 57  | Female | IIc       | wt                  | No                                    | 0                               | 7              | Yes        | 12                       | No    |
| 489               | Mucosal | 38  | Female | IV        | wt                  | Yes                                   | 1                               | 1.5            | No         | 17                       | Yes   |
| 490               | Mucosal | 62  | Male   | IV        | wt                  | No                                    | 0                               | NA             | NA         | 26                       | Yes   |
| 491               | UP      | 38  | Female | NA        | wt                  | No                                    | 0                               | NA             | NA         | NA                       | NA    |
| 492               | Mucosal | 40  | Male   | IIla      | wt                  | No                                    | 0                               | 2              | No         | 8                        | Yes   |
| 493               | Non-CSD | 61  | Male   | IV        | wt                  | No                                    | 1                               | 5              | Yes        | 6                        | Yes   |
| 494               | Acral   | 58  | Male   | IIla      | L576P               | No                                    | 1                               | 7              | Yes        | 22                       | Yes   |
| 495               | Acral   | 70  | Male   | IIc       | V489I               | No                                    | 0                               | 10             | Yes        | 6                        | Yes   |
| 496               | Mucosal | 64  | Male   | IV        | wt                  | Yes                                   | 1                               | 10             | No         | 24                       | Yes   |
| 497               | Mucosal | 64  | Male   | IIa       | wt                  | No                                    | 0                               | 3              | No         | 49                       | Yes   |
| 498               | Mucosal | 30  | Male   | Ib        | wt                  | No                                    | 1                               | 2              | No         | 24                       | No    |
| 499               | UP      | 64  | Female | IIla      | wt                  | No                                    | 0                               | NA             | NA         | 24                       | No    |
| 500               | Acral   | 72  | Female | NA        | wt                  | No                                    | 3                               | 1.5            | No         | 22                       | No    |
| 501               | Non-CSD | 52  | Male   | Ib        | I571-L576del        | No                                    | 1                               | 2              | No         | 45                       | No    |
| 502               | Acral   | 54  | Female | IIb       | wt                  | No                                    | 1                               | 4.5            | No         | 43                       | No    |

Abbreviations: TNM, tumor-node-metastases; IHC, immunohistochemistry; UP, unknown primary; CSD, melanomas on skin with chronic sun-induced damage; Non-CSD, melanomas on skin without chronic sun-induced damage; wt, wild type; NA, not available; del, deletion.

<sup>a</sup> Code No. was designated by the order of samples obtained after exclusion of cases unqualified for genomic DNA analysis.

<sup>b</sup> The threshold for *KIT* gene copy number increase was 3.40 copies of *KIT* relative to RNase P.

<sup>c</sup> The signal intensity of immunohistochemistry results were determined by three individual pathologists and scored as 0, 1, 2 and 3 with score "0" as negative and score "3" as the strongest.

## Kong Y. et al. Supplementary Table S2

**Supplementary Table S2.** Primers Used in This Study for Analysis of KIT Genetic Aberrations\*†

| Exon | Primer Set 1                    | Primer Set 2                    |
|------|---------------------------------|---------------------------------|
| 9    | F:5'-AACTCAGTGTGGTGGGGT-3'      | F: 5'-AAAGTATGCCACATCCCAAG-3'   |
|      | R:5'-TTGTTCTAATTCTGTTGGGTG-3'   | R: 5'-ACAGAGCCTAAACATCCCCT-3'   |
| 11   | F: 5'-TATTGTGATGATTCTGACCTAC-3' | F: 5'-GTGCTCTAATGACTGAGACAAT-3' |
|      | R: 5'-TTTTCTACGATGTTCTCTATG-3'  | R: 5'-GGAACAAAACAAGGAAGC-3'     |
| 13   | F: 5'-TTTCGGAAGGTTGTTGAGG-3'    | F: 5'-ACTGTCGCTGTAAAGATGCTCA-3' |
|      | R: 5'-ATAACTAGGGTATGTCCTGGGC-3' | R: 5'-ACAACAGTCTGGGTAAAAAAT-3'  |
| 17   | F: 5'-TACTTTTGATTTTATTTTGG-3'   | F: 5'-AGTTAGTTTTCACTCTTACAA-3'  |
|      | R: 5'-ACCTACATTTGTTACACTTGAG-3' | R: 5'-TAAAATGTGTGATATCCCTAGA-3' |
| 18   | F: 5'-ATGTATTCAGAGGTGATTGGG-3'  | F: 5'-TTCAGCAACAGCAGCATCTATA-3' |
|      | R: 5'-GTGTTTCAGGGCTGAGCATCC-3'  | R: 5'-GCAGGACACCAATGAAACTT-3'   |

Abbreviations: F, forward primer; R, reverse primer.

\* Nested PCR was used for the examination of genetic mutations in *KIT* gene.

† For each sample,  $\Delta C_i$  for *KIT* versus RNase P was calculated as  $\Delta C_i = C_i(\text{KIT}) - C_i(\text{RNase P})$ . The  $\Delta C_i$  value for each experimental test sample was calibrated to a reference pool of genomic DNA prepared from five samples of formalin-fixed, paraffin-embedded benign nevi tissue, using the formula  $\Delta\Delta C_i = \Delta C_i(\text{test sample}) - \Delta C_i(\text{reference pool})$ . Relative DNA copy number was calculated using the formula  $2^{-\Delta\Delta C_i}$ . Relative copy numbers were converted to absolute copy numbers by assigning a value of 2 (diploid) to the reference pool and multiplying the relative copy number of test samples by a factor of 2. The *KIT* copy number was determined by comparison to five individual formalin-fixed, paraffin-embedded benign nevi samples. The means and SDs of the five samples, based on triplicate measurements, were  $1.39 \pm 0.45$  *KIT* copies relative to RNase P. The threshold for increased *KIT* copy number was set relative to these normal samples using the 95% confidence level according to Chebychev's inequality, with the formula:  $\text{mean} \pm (4.47 \times \text{SD})$ . The threshold was 3.40 copies of *KIT* relative to RNase P.

## Kong Y. et al. Supplementary Table S3

**Supplementary Table S3.** Correlation of *KIT* aberrations to clinical features of melanoma

| KIT alteration                            | Age (year) <sup>b</sup> | Female (%) <sup>c</sup> | Clinical Stage <sup>d</sup> |            |            |            | Thickness (mm) <sup>e</sup> | Ulceration (%) <sup>f</sup> |
|-------------------------------------------|-------------------------|-------------------------|-----------------------------|------------|------------|------------|-----------------------------|-----------------------------|
|                                           |                         |                         | I                           | II         | III        | IV         |                             |                             |
| <b>KIT Mutation</b>                       |                         |                         |                             |            |            |            |                             |                             |
| Mutation                                  | 54.65 ± 12.58           | 25 (46.3)               | 2 (3.9)                     | 19 (37.3)  | 11 (21.6)  | 19 (37.3)  | 5.24 ± 2.63                 | 55.1                        |
| WT                                        | 54.02 ± 14.60           | 237 (52.9)              | 13 (3.3)                    | 126 (31.6) | 118 (29.6) | 142 (35.6) | 4.91 ± 2.54                 | 59.7                        |
| P Value                                   | 0.72                    | 0.45                    | 0.88                        | 0.51       | 0.31       | 0.94       | 0.46                        | 0.65                        |
| <b>KIT Gene Copy Number</b>               |                         |                         |                             |            |            |            |                             |                             |
| Increased                                 | 52.57 ± 14.59           | 22 (59.5)               | 2 (6.3)                     | 8 (25.0)   | 11 (34.4)  | 11 (34.4)  | 5.08 ± 2.60                 | 51.5                        |
| Normal                                    | 54.21 ± 14.38           | 240 (51.6)              | 13 (3.1)                    | 137 (32.8) | 118 (28.2) | 150 (35.9) | 4.94 ± 2.54                 | 59.9                        |
| P Value                                   | 0.51                    | 0.47                    | 0.67                        | 0.48       | 0.61       | 0.98       | 0.84                        | 0.47                        |
| <b>Genetic KIT Aberration<sup>g</sup></b> |                         |                         |                             |            |            |            |                             |                             |
| Aberrated                                 | 53.88 ± 13.69           | 45 (52.3)               | 3 (3.8)                     | 26 (33.3)  | 21 (26.9)  | 28 (35.9)  | 5.24 ± 2.55                 | 52.3                        |
| Non Aberration                            | 54.13 ± 14.54           | 217 (52.2)              | 12 (3.2)                    | 119 (32.0) | 108 (29.0) | 133 (35.8) | 4.89 ± 2.54                 | 52.2                        |
| P Value                                   | 0.15                    | 0.92                    | 0.95                        | 0.93       | 0.82       | 0.92       | 0.89                        | 0.92                        |
| <b>CD117 Overexpression</b>               |                         |                         |                             |            |            |            |                             |                             |
| Positive                                  | 52.31 ± 13.58           | 107 (53.8)              | 8 (4.4)                     | 63 (34.4)  | 51 (27.9)  | 61 (33.3)  | 4.92 ± 2.61                 | 53.8                        |
| Negative                                  | 55.25 ± 14.80           | 155 (51.2)              | 7 (2.6)                     | 82 (30.7)  | 78 (29.2)  | 100 (37.4) | 4.97 ± 2.50                 | 51.2                        |
| P Value                                   | 0.14                    | 0.65                    | 0.47                        | 0.48       | 0.85       | 0.44       | 0.75                        | 0.65                        |

Abbreviations: WT, wild type.

<sup>a</sup> Genetic aberration includes *KIT* mutation and increased gene copy number.

<sup>b</sup> Significance evaluated by unpaired t tests.

<sup>c</sup> Significance evaluated by Chi-square tests.

<sup>d</sup> The stages were designated according to the tumor-node-metastasis (TNM) criteria. Significance was evaluated by Chi-square tests.

<sup>e</sup> Significance evaluated by Chi-square tests.

<sup>f</sup> Significance evaluated by unpaired t tests.
